# Supplementary material for: Chronic Nicotine Exposure Increases Hematoma Expansion following Collagenase-Induced Intracerebral Hemorrhage in Rats
Source: MDPI journal article supplement (doi:10.3390/biom12050621), 2022-04-21
Supplement: s1 [file s1]

## **SUPPLEMENTAL MATERIAL**

**Table S1.** Physiological parameters before and after collagenase injection in rats.

| Groups      |                         | Sampling time    | Body Weight (g) | Body Temperature (°C) | Head Temperature (°C) | pH          | pCO <sub>2</sub> (mmHg) | pO <sub>2</sub> (mmHg) | MABP (mmHg) | Blood glucose (mg / dL) |
|-------------|-------------------------|------------------|-----------------|-----------------------|-----------------------|-------------|-------------------------|------------------------|-------------|-------------------------|
| Male rats   | Vehicle-treated (n=10)  | Before injection | 322 ± 9         | 37.1 ± 0.1            | 36.7 ± 0.1            | 7.39 ± 0.02 | 37 ± 1                  | 109 ± 5                | 103 ± 2     | 114 ± 7                 |
|             |                         | After injection  |                 | 37.0 ± 0.1            | 36.8 ± 0.1            | 7.39 ± 0.02 | 36 ± 0                  | 114 ± 5                | 101 ± 2     |                         |
|             | Nicotine-treated (n=10) | Before injection | 341 ± 10        | 37.0 ± 0.1            | 36.7 ± 0.0            | 7.39 ± 0.02 | 37 ± 1                  | 107 ± 7                | 99 ± 2      | 112 ± 8                 |
|             |                         | After injection  |                 | 37.1 ± 0.1            | 36.7 ± 0.1            | 7.39 ± 0.02 | 35 ± 1                  | 124 ± 6                | 100 ± 3     |                         |
| Female rats | Vehicle-treated (n=10)  | Before injection | 261 ± 5         | 37.1 ± 0.1            | 36.6 ± 0.0            | 7.32 ± 0.01 | 37 ± 1                  | 92 ± 4                 | 109 ± 2     | 144 ± 5                 |
|             |                         | After injection  |                 | 36.8 ± 0.1            | 36.7 ± 0.1            | 7.32 ± 0.01 | 35 ± 1                  | 95 ± 4                 | 106 ± 2     |                         |
|             | Nicotine-treated (n=10) | Before injection | 266 ± 6         | 36.8 ± 0.1            | 36.5 ± 0.0            | 7.31 ± 0.01 | 39 ± 1                  | 99 ± 5                 | 112 ± 3     | 139 ± 7                 |
|             |                         | After injection  |                 | 37.0 ± 0.1*           | 36.8 ± 0.1            | 7.32 ± 0.01 | 36 ± 1**                | 103 ± 3                | 110 ± 3     |                         |

\* p&lt;0.05 vs respective control.

\*\* p&lt;0.01 vs respective control.
